# Supplementary material for: Processive binding mechanism of Cel9G from Clostridium cellulovorans: molecular dynamics and free energy landscape investigations
Source: Royal Society of Chemistry journal article supplement (doi:10.1039/d2cp04830b), 2022-12-06
Supplement: d2cp04830b1.pdf [file d2cp04830b1.pdf]

**Support Information for:**

**Processive Binding Mechanism of Cel9G from *Clostridium cellulovorans*:**

**Molecular Dynamics and Free Energy Landscape Investigations**

Penghui Li<sup>1</sup>, Xin Wang<sup>1</sup>, Chunchun Zhang<sup>2\*</sup> and Dingguo Xu<sup>1\*</sup>

<sup>1</sup>College of Chemistry, MOE Key Laboratory of Green Chemistry and Technology,

Sichuan University, Sichuan, Chengdu, 610064, PR China

<sup>2</sup>Analytical&Testing Center, Sichuan University, Sichuan, Chengdu, 610064, PR

China

\* To correspondence should be addressed: cczh@scu.edu.cn (CZ) and dgxu@scu.edu.cn (DX), Tel: 86-28-85406156

## Contents

|                                                                                                                                                                                                                                                                                   |     |
|-----------------------------------------------------------------------------------------------------------------------------------------------------------------------------------------------------------------------------------------------------------------------------------|-----|
| <b>Table S1.</b> Some basic terminologies involved in this work. ....                                                                                                                                                                                                             | S3  |
| <b>Table S2.</b> Box size and total atom number of each model. ....                                                                                                                                                                                                               | S4  |
| <b>Figure S1.</b> Initial structures for all three systems extracted from Cel9G/G18 model reported in our previous work. (a) Cel9G/G6, (b) Cel9G/G12, (c) Y520A/G12. ....                                                                                                         | S5  |
| <b>Figure S2.</b> Root-mean-square deviations (RMSD) of backbone atoms compared to the crystal structure (PDB ID: 1KFG) during the 200 ns of classic molecular dynamics of the Pre-Slide mode of each model. ....                                                                 | S6  |
| <b>Figure S3.</b> Overlap of 100 snapshots from the 200 ns of classic molecular dynamics of the Pre-Slide modes for each model. The snapshot was saved every 1 ns. The sugar chains were shown in green lines, and the substrate-binding residues were shown in black lines. .... | S7  |
| <b>Figure S4.</b> Sampling of the metadynamics (left), time series of CV1 (middle) and CV2 (right). ....                                                                                                                                                                          | S8  |
| <b>Figure S5.</b> Convergence analyses of the metadynamics simulations, which were characterized by the PMF evolution along the simulation time (left) and the block-analysis (right). The units for energy are in kcal/mol. ....                                                 | S9  |
| Figure S6. Representative snapshot from metadynamics trajectory of Cel9G/G6 system for third intermediate state (INT3). ....                                                                                                                                                      | S10 |
| Figure S7. Representative snapshot from metadynamics trajectory of Cel9G/G12 system for slide mode which shows the entire complex structure. ....                                                                                                                                 | S11 |
| <b>Figure S8.</b> The representative snapshot for PS' state during the metadynamic of Y520A/G12 system. ....                                                                                                                                                                      | S12 |

**Table S1.** Some basic terminologies involved in this work.

| <b>Terminologies</b>       | <b>Definition</b>                                                                                          |
|----------------------------|------------------------------------------------------------------------------------------------------------|
| <b>Processivity</b>        | The ability of the enzyme to continuously reaction without releasing the template/substrate strand.        |
| <b>Processive binding</b>  | The process for the substrate to fill the active site of a processive enzyme after one catalytic reaction. |
| <b>Pucker conformer</b>    | The conformation of a sugar ring resulting from the out-of-plane motions of some atoms.                    |
| <b>Multimodular enzyme</b> | The enzyme containing multiple functional modules.                                                         |
| <b>CBM3c</b>               | Carbohydrate-Binding Module family 3c                                                                      |
| <b>GH9</b>                 | Glycoside Hydrolase family 9                                                                               |

**Table S2.** Box size and total atom number of each model.

| Model     | Box Size             | Atom Number |
|-----------|----------------------|-------------|
| Cel9G/G6  | 130 Å × 84 Å × 103 Å | 93808       |
| Cel9G/G12 | 130 Å × 84 Å × 103 Å | 93772       |
| Y520A/G12 | 89 Å × 87 Å × 137 Å  | 88442       |

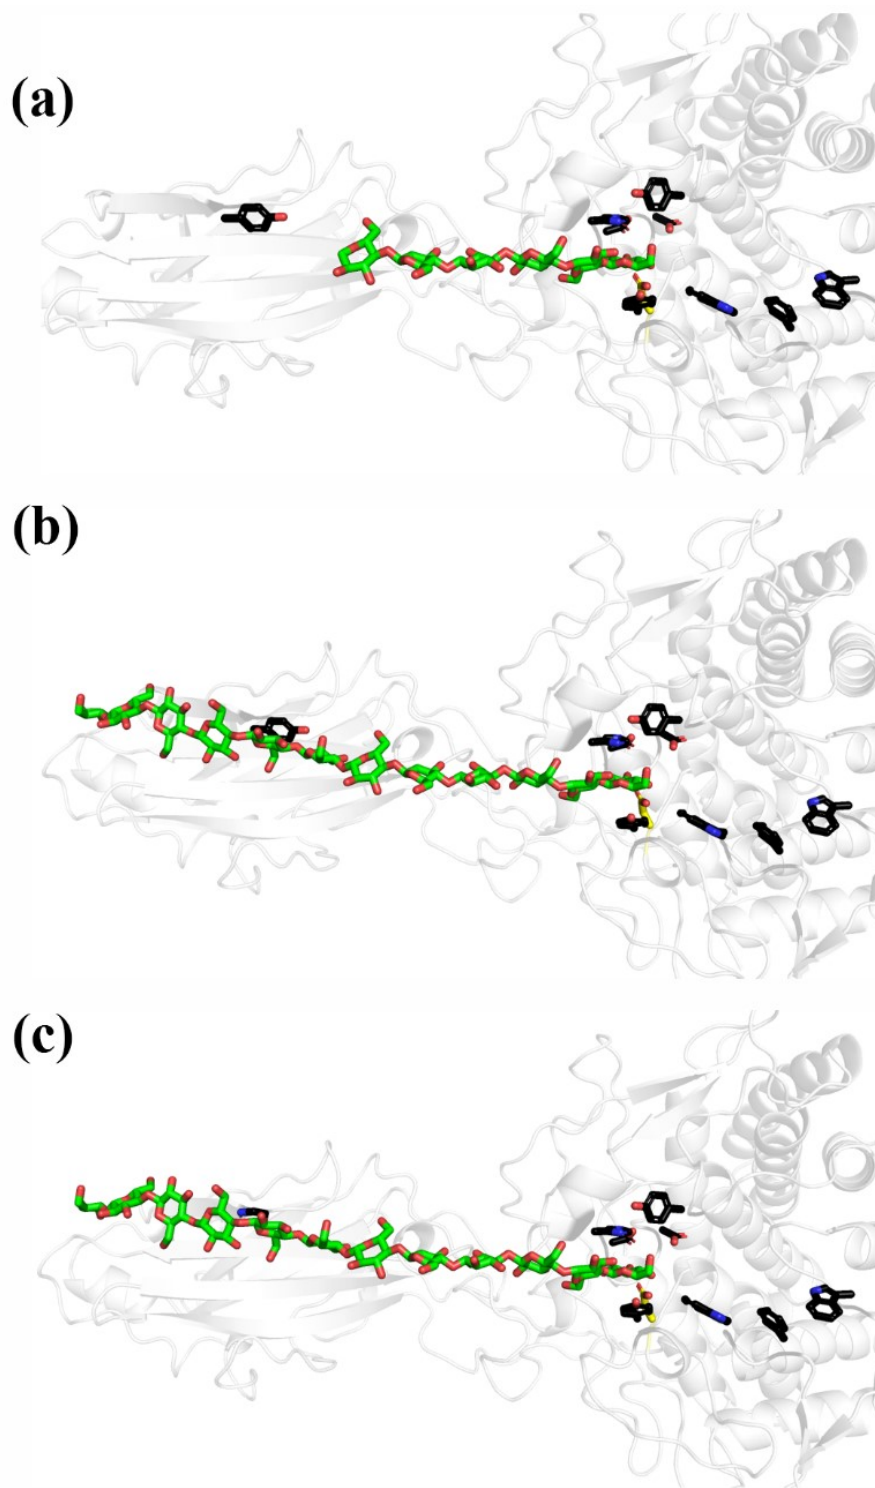

**Figure S1.** Initial structures for all three systems extracted from Cel9G/G18 model reported in our previous work. (a) Cel9G/G6, (b) Cel9G/G12, (c) Y520A/G12.

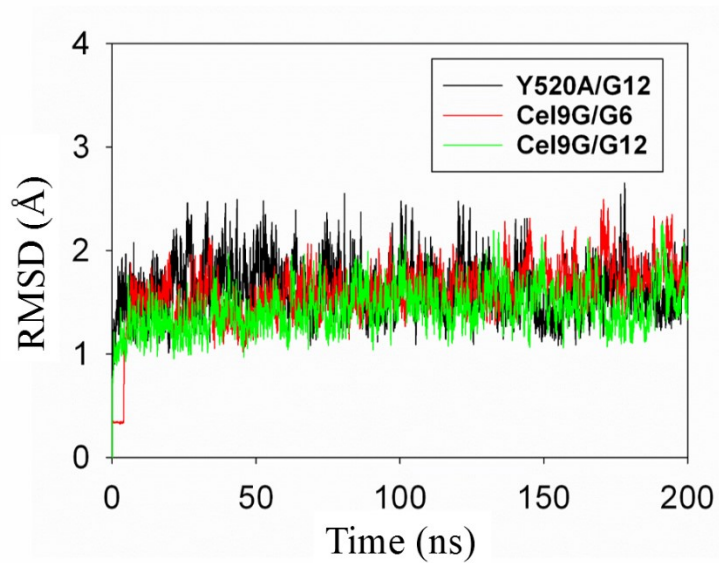

**Figure S2.** Root-mean-square deviations (RMSD) of backbone atoms compared to the crystal structure (PDB ID: 1KFG) during the 200 ns of classic molecular dynamics of the Pre-Slide mode of each model.

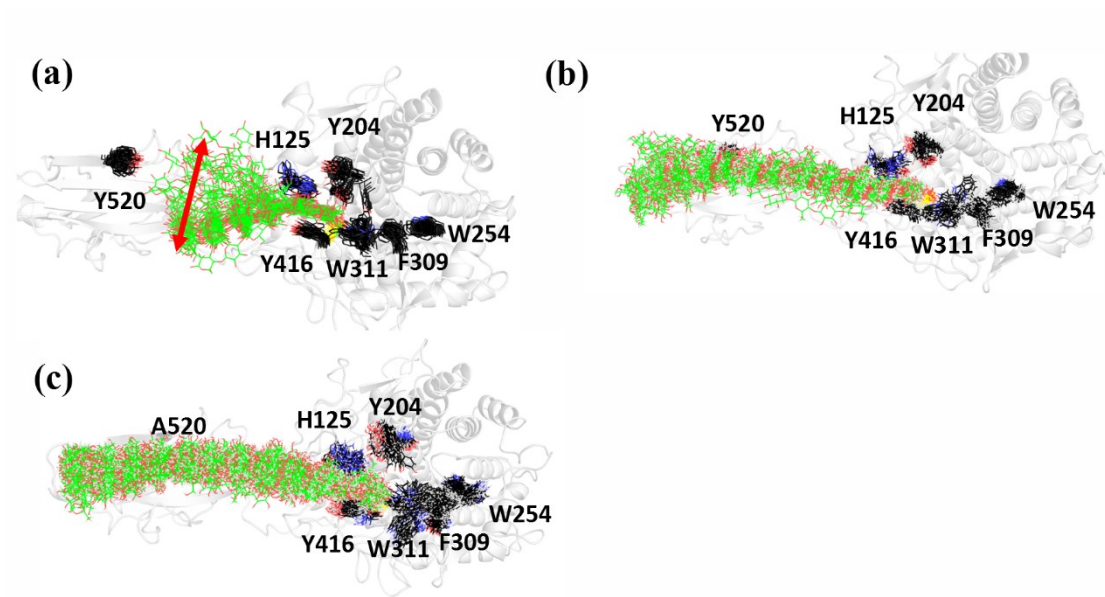

**Figure S3.** Overlap of 100 snapshots from the 200 ns of classic molecular dynamics of the Pre-Slide modes for each model. The snapshot was saved every 1 ns. The sugar chains were shown in green lines, and the substrate-binding residues were shown in black lines.

**(a) CeI9G/G6**

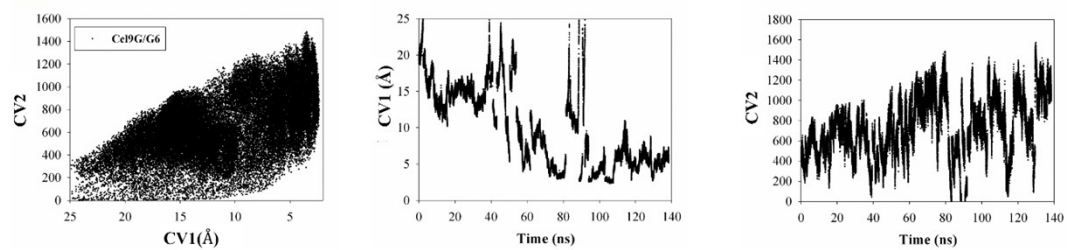

**(b) CeI9G/G12**

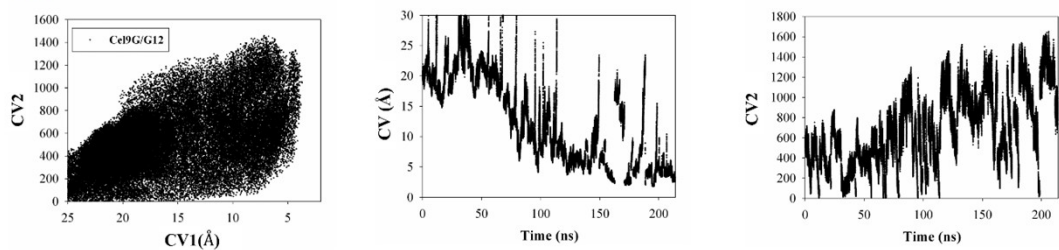

**(c) Y520A/G12**

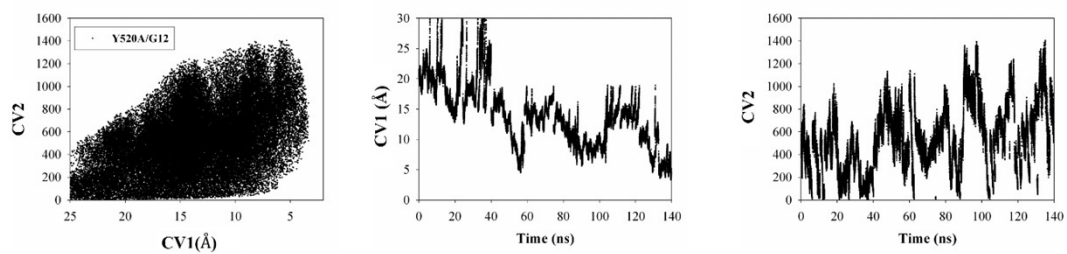

**Figure S4.** Sampling of the metadynamics (left), time series of CV1 (middle) and CV2 (right).



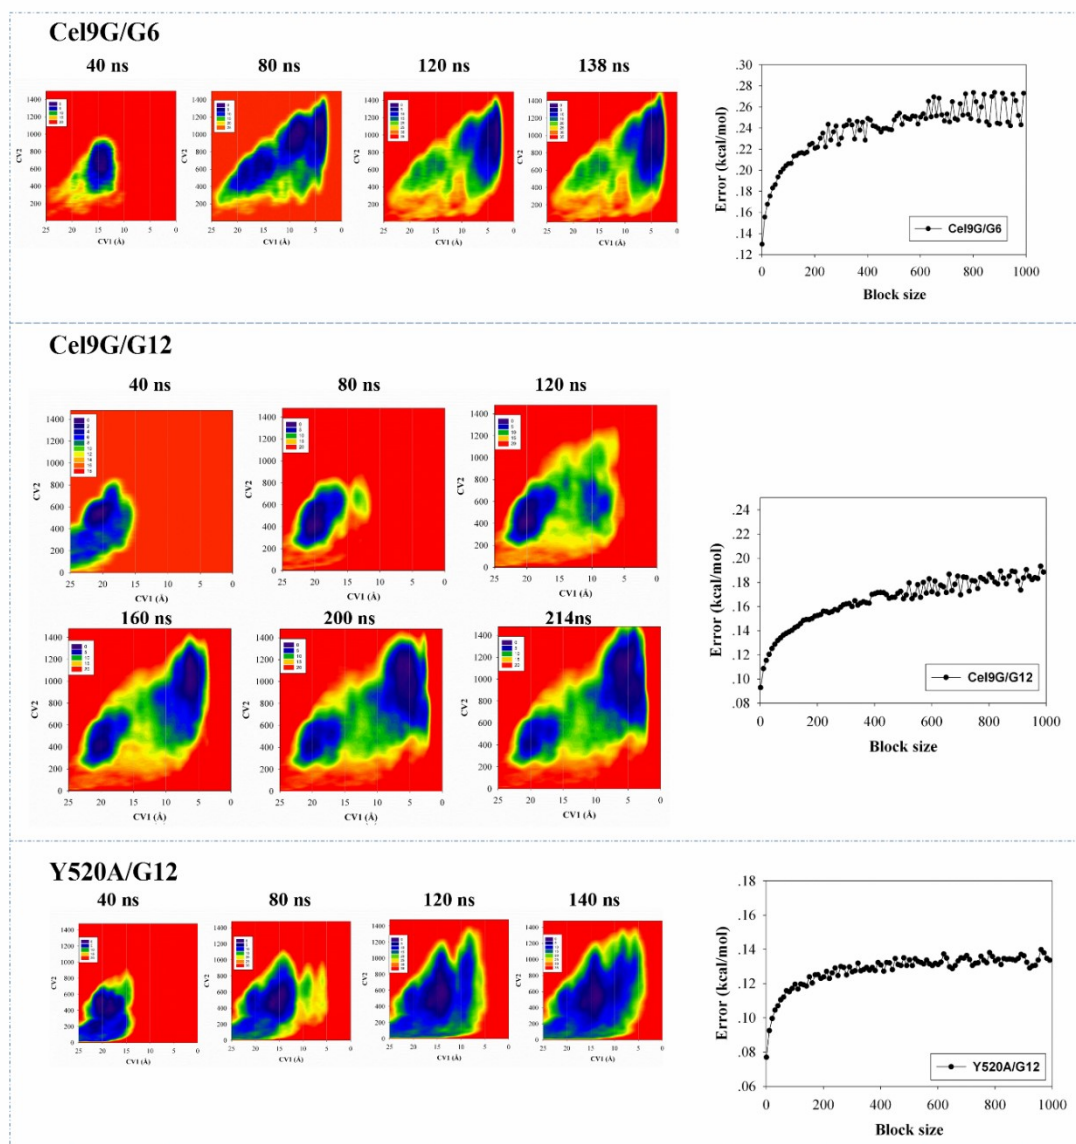

**Figure S5.** Convergence analyses of the metadynamics simulations, which were characterized by the PMF evolution along the simulation time (left) and the block-analysis (right). The units for energy are in kcal/mol.

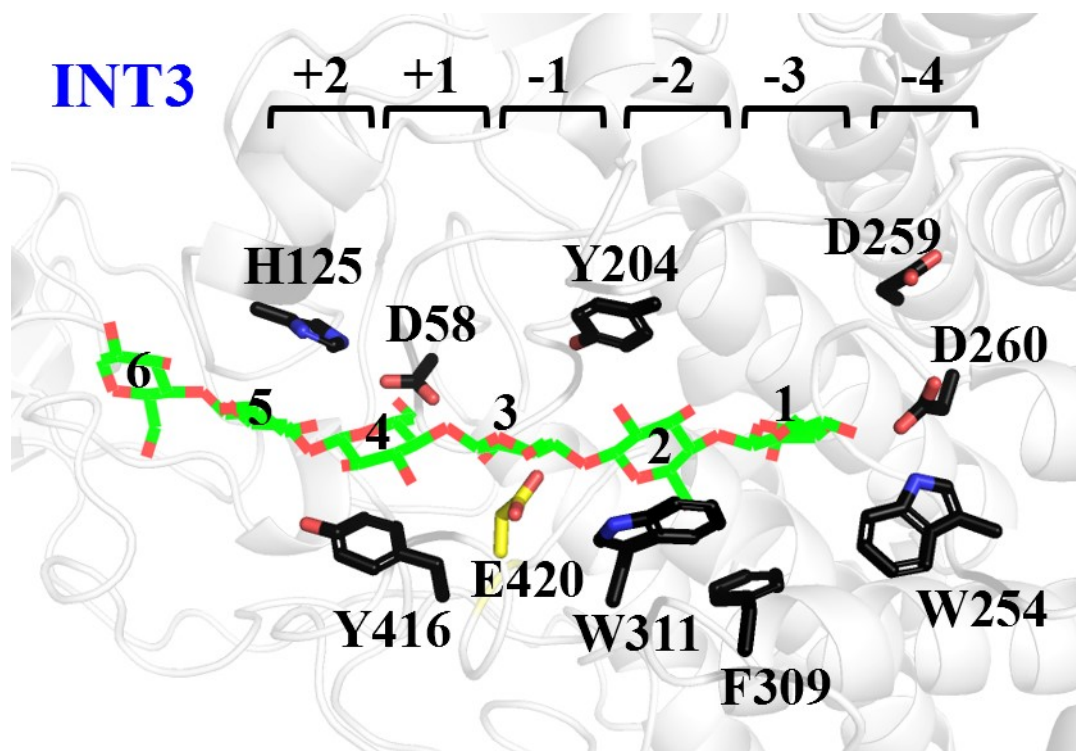

Figure S6. Representative snapshot from metadynamics trajectory of Cel9G/G6 system for third intermediate state (INT3).

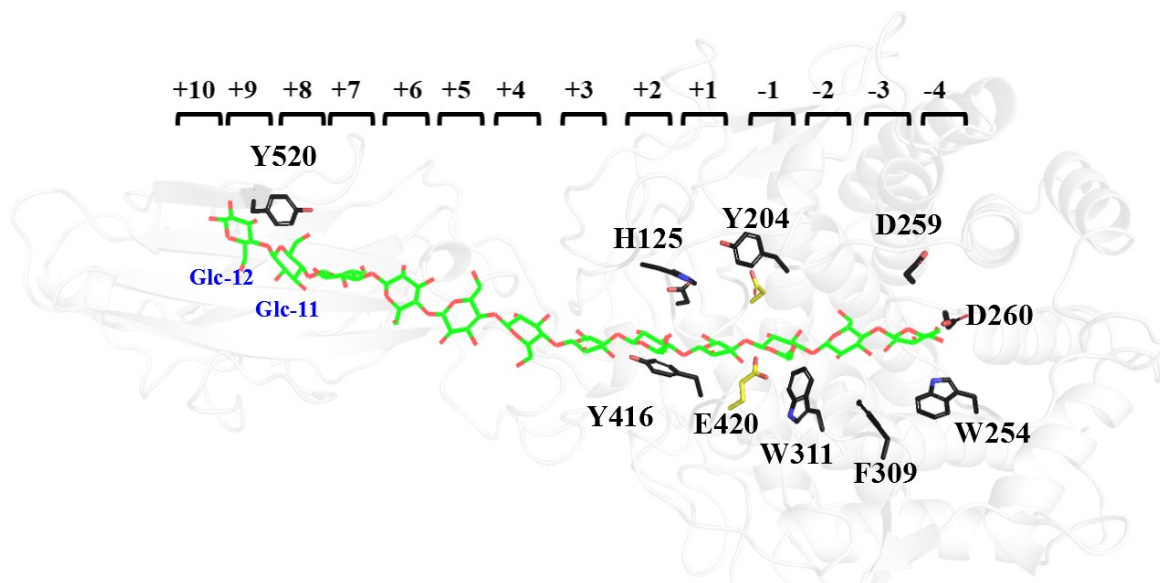

Figure S7. Representative snapshot from metadynamics trajectory of Cel9G/G12 system for slide mode which shows the entire complex structure.

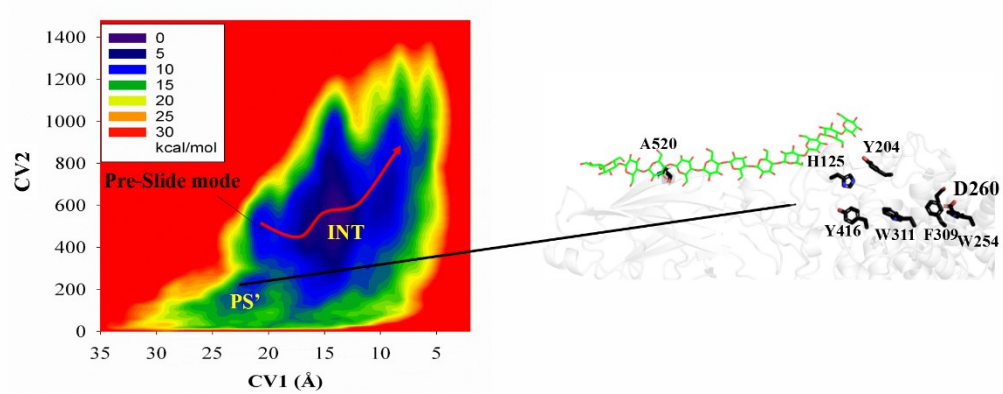

**Figure S8.** The representative snapshot for PS' state during the metadynamics of Y520A/G12 system.
